# Supplementary material for: Exploring genetic architecture of grain yield and quality traits in a 16-way indica by japonica rice MAGIC global population
Source: PubMed Central journal article supplement (PMC6925145; doi:10.1038/s41598-019-55357-7), 2019-12-20
Supplement: 41598_2019_55357_MOESM1_ESM.pdf [file 41598_2019_55357_MOESM1_ESM.pdf]

**Exploring genetic architecture of grain yield and quality traits in a 16-way *indica* by *japonica* rice MAGIC global population**

Hein Zaw<sup>1,3</sup>, Chitra Raghavan<sup>1</sup>, Arnel Pocsedio<sup>1</sup>, B.P. Mallikarjuna Swamy<sup>1</sup>, Mona Liza Jubay<sup>1</sup>, Rakesh Kumar Singh<sup>4</sup>, Justine Bonifacio<sup>1</sup>, Ramil Mauleon<sup>1</sup>, Jose E. Hernandez<sup>2</sup>, Merlyn S. Mendioro<sup>2</sup>, Glenn B Gregorio<sup>1,2</sup>, Hei Leung\*<sup>1</sup>

Supplementary Table S1: Phenotypic variations in 16 traits of MAGIC global population in two dry seasons.

| Trait         | Range          | Mean   | Stdev | Dry seasons |
|---------------|----------------|--------|-------|-------------|
| PHT(cm)       | 77.47 – 185.12 | 113.37 | 3.58  | 2015DS      |
| PHT(cm)       | 71.60 – 169.10 | 110.35 | 4.19  | 2016DS      |
| PTN(no.)      | 6 – 37.67      | 11.3   | 1.87  | 2015DS      |
| PTN(no.)      | 7 – 43.3       | 17.3   | 2.42  | 2016DS      |
| PNL(cm)       | 18 – 36.33     | 23.64  | 0.77  | 2015DS      |
| PNL(cm)       | 13.57 – 34.7   | 24.55  | 1.76  | 2016DS      |
| SPAD          | 1.5 – 19.4     | 4.37   | 1.43  | 2015DS      |
| SPAD          | 0.72 – 25.80   | 5.25   | 2.1   | 2016DS      |
| DTF(day)      | 70.69 – 115.80 | 88.33  | 1.92  | 2016DS      |
| GYLD(tons/ha) | 1.26 – 12.65   | 4.79   | 0.73  | 2015DS      |
| GYLD(tons/ha) | 1.28 – 14.52   | 4.97   | 1.01  | 2016DS      |
| FG(no.)       | 22.81 – 222.29 | 94.53  | 25.57 | 2016DS      |
| UF(no.)       | 2.6 – 135      | 25.89  | 17.81 | 2016DS      |
| TGN(no.)      | 24.46 – 296.79 | 150.65 | 12.36 | 2015DS      |
| TGN(no.)      | 29.15 – 285.30 | 96.65  | 33.37 | 2016DS      |
| GWT(gram)     | 1.03 – 5.83    | 2.96   | 0.23  | 2015DS      |
| GWT(gram)     | 0.54 – 5.70    | 1.91   | 0.48  | 2016DS      |
| AC(%)         | 11.96 – 28.64  | 21.8   | 0.84  | 2016DS      |
| GL(mm)        | 4.69 – 7.67    | 5.79   | 0.18  | 2016DS      |
| GW(mm)        | 1.74 – 2.73    | 2.16   | 0.08  | 2016DS      |
| CHALKY(%)     | 0.016 – 50.84  | 2.97   | 3.58  | 2016DS      |
| Zn(ppm)       | 9.7- 31.27     | 17.17  | 1.96  | 2015DS      |
| Zn(ppm)       | 9.22 – 26.83   | 14.52  | 1.08  | 2016DS      |
| Fe(ppm)       | 0.99 – 11.62   | 4.72   | 0.86  | 2015DS      |
| Fe(ppm)       | 0.4 - 11       | 3.47   | 0.91  | 2016DS      |

Supplementary Table S2: Linkage disequilibrium statistics in MAGIC global population using 66,309 SNP markers.

| <b>Distance</b> | <b>Mean <math>r^2</math> of significant LD marker pairs</b> | <b>Number of significant LD marker pairs</b> | <b>% significant LD in <math>r^2 &gt; 0.2</math></b> | <b>Mean <math>r^2</math> in Marker Pairs (<math>r^2 &gt; 0.2</math>)</b> | <b>Marker Pairs in complete LD (<math>r^2 &gt; 0.9</math>)</b> |
|-----------------|-------------------------------------------------------------|----------------------------------------------|------------------------------------------------------|--------------------------------------------------------------------------|----------------------------------------------------------------|
| 0 – 5kb         | 0.4976564                                                   | 163105                                       | 101607                                               | 0.7631035                                                                | 53787                                                          |
| 5 – 50kb        | 0.3813683                                                   | 654404                                       | 347782                                               | 0.6661668                                                                | 108191                                                         |
| 50 – 100kb      | 0.3269357                                                   | 667912                                       | 321507                                               | 0.6159242                                                                | 59468                                                          |
| 100 - 200kb     | 0.283672                                                    | 1291241                                      | 563045                                               | 0.5761866                                                                | 58916                                                          |
| 200 - 400kb     | 0.237557                                                    | 2523227                                      | 971233                                               | 0.5273503                                                                | 43738                                                          |
| 400 - 600kb     | 0.1974864                                                   | 2465354                                      | 816898                                               | 0.4857807                                                                | 18824                                                          |
| 600 - 800kb     | 0.1710361                                                   | 2415144                                      | 707345                                               | 0.4568373                                                                | 12280                                                          |
| 800 - 1000kb    | 0.1532413                                                   | 2368339                                      | 629529                                               | 0.4348107                                                                | 9002                                                           |
| 1 - 1.2Mb       | 0.1376961                                                   | 2321059                                      | 553478                                               | 0.4208944                                                                | 7698                                                           |
| 1.2 - 1.4Mb     | 0.1238276                                                   | 2286020                                      | 481675                                               | 0.4089487                                                                | 6243                                                           |
| 1.4 - 1.6Mb     | 0.1133103                                                   | 2265766                                      | 433459                                               | 0.3966835                                                                | 5824                                                           |

Supplementary Table S3. Candidate QTLs and co-located QTLs detected by GWAS for 16 traits using MAGIC global population.

| Trait | SNP         | Chr | Pos      | P.value  | PVE (%) | Detected QTLs (Term) | Reported QTLs          | Start      | End        | DB      |
|-------|-------------|-----|----------|----------|---------|----------------------|------------------------|------------|------------|---------|
| PHT   | S1_38286772 | 1   | 38286772 | 3.18E-38 | 39.8    | <i>qPHT1</i>         | <i>qPH<sub>1</sub></i> | 38,382,385 | 38,385,469 | RAP DB  |
|       | S1_38292649 | 1   | 38292649 | 1.26E-31 | 37.4    | <i>qPHT1</i>         | <i>qPH<sub>1</sub></i> | 38,382,385 | 38,385,469 | RAP DB  |
|       | S1_38433096 | 1   | 38433096 | 6.31E-31 | 37.1    | <i>qPHT1</i>         | <i>qPH<sub>1</sub></i> | 38,382,385 | 38,385,469 | RAP DB  |
|       | S3_1195479  | 3   | 1195479  | 2.19E-05 | 28.4    | <i>qPHT3</i>         | <i>Hd9</i>             | 975995     | 1427051    | qtaro   |
|       | S3_1682760  | 3   | 1682760  | 4.69E-05 | 28.3    | <i>qPHT3</i>         | <i>Hd9</i>             | 975995     | 1427051    | qtaro   |
|       | S3_1270943  | 3   | 1270943  | 5.12E-05 | 28.3    | <i>qPHT3</i>         | <i>Hd9</i>             | 1,270,320  | 1,300,273  | RAP DB  |
| PTN   | S4_31162467 | 4   | 31162467 | 5.68E-05 | 8.9     | <i>qTn4</i>          | <i>Tn</i>              | 24,732,111 | 31,065,616 | Gramene |
|       | S4_31215525 | 4   | 31215525 | 9.51E-05 | 8.8     | <i>qTn4</i>          | <i>Tn</i>              | 24,732,111 | 31,065,616 | Gramene |
| DTF   | S3_1270943  | 3   | 1270943  | 1.71E-17 | 15.5    | <i>qDTF3</i>         | <i>qDF<sub>3</sub></i> | 1,270,320  | 1,300,273  | RAP DB  |
|       | S3_1195479  | 3   | 1195479  | 1.03E-16 | 15.2    | <i>qDTF3</i>         | <i>Hd9</i>             | 975995     | 1427051    | qtaro   |
|       | S3_1796079  | 3   | 1796079  | 1.72E-13 | 13.8    | <i>qDTF3</i>         | <i>Hd9</i>             | 975995     | 1427051    | qtaro   |
|       | S6_8338324  | 6   | 8338324  | 1.80E-05 | 10.4    | <i>qDTF6</i>         | <i>Hd1</i>             | 9,282,505  | 9,327,178  | Gramene |
|       | S6_8338327  | 6   | 8338327  | 1.80E-05 | 10.4    | <i>qDTF6</i>         | <i>Hd1</i>             | 9,282,505  | 9,327,178  | Gramene |
|       | S6_8338333  | 6   | 8338333  | 1.80E-05 | 10.4    | <i>qDTF6</i>         | <i>Hd1</i>             | 9,282,505  | 9,327,178  | Gramene |
| PNL   | S1_34704181 | 1   | 34704181 | 1.27E-05 | 12.3    | <i>qPNL1</i>         | <i>qPL-1</i>           | 34,032,918 | 34,940,769 | Gramene |
|       | S1_38440552 | 1   | 38440552 | 7.91E-06 | 12.4    | <i>qPNL1.1</i>       | <i>qPH<sub>1</sub></i> | 38,382,385 | 38,385,469 | RAP DB  |
|       | S1_38244911 | 1   | 38244911 | 1.04E-05 | 12.3    | <i>qPNL1.1</i>       | <i>qPH<sub>1</sub></i> | 38,382,385 | 38,385,469 | RAP DB  |
|       | S3_8548868  | 3   | 8548868  | 9.64E-05 | 12.0    | <i>qPNL3</i>         | <i>gl3a</i>            | 8460597    | 9806441    | qtaro   |
|       | S7_24669663 | 7   | 24669663 | 1.53E-05 | 12.3    | <i>qPNL7</i>         | <i>PL</i>              | 17,525,817 | 25,775,868 | Gramene |
|       | S7_24669596 | 7   | 24669596 | 1.70E-05 | 12.3    | <i>qPNL7</i>         | <i>PL</i>              | 17,525,817 | 25,775,868 | Gramene |
|       | S7_24645555 | 7   | 24645555 | 2.58E-05 | 12.2    | <i>qPNL7</i>         | <i>PL</i>              | 17,525,817 | 25,775,868 | Gramene |
|       | S7_28960591 | 7   | 28960591 | 6.17E-05 | 12.0    | <i>qPNL7.1</i>       | <i>fzp</i>             | 28959761   | 28961248   | qtaro   |
| SPAD  | S1_38244911 | 1   | 38244911 | 3.57E-08 | 4.8     | <i>qCHP1</i>         | <i>QDg1</i>            | 32,987,234 | 37,889,506 | Gramene |
|       | S1_38207165 | 1   | 38207165 | 8.58E-08 | 4.7     | <i>qCHP1</i>         | <i>QDg1</i>            | 32,987,234 | 37,889,506 | Gramene |
|       | S1_38286772 | 1   | 38286772 | 2.07E-07 | 4.5     | <i>qCHP1</i>         | <i>QDg1</i>            | 32,987,234 | 37,889,506 | Gramene |
|       | S4_19858550 | 4   | 19858550 | 1.14E-05 | 3.8     | <i>qCHP4</i>         | <i>QDg4a</i>           | 18,824,746 | 20,519,179 | Gramene |
|       | S4_19895568 | 4   | 19895568 | 4.98E-05 | 3.5     | <i>qCHP4</i>         | <i>QDg4a</i>           | 18,824,746 | 20,519,179 | Gramene |
|       | S4_19850161 | 4   | 19850161 | 4.78E-07 | 4.3     | <i>qCHP4</i>         | <i>QDg4a</i>           | 18,824,746 | 20,519,179 | Gramene |
| FG    | S4_31133351 | 4   | 31133351 | 1.98E-06 | 6.0     | <i>qFG4</i>          | <i>gn-4</i>            | 30,630,093 | 34,698,383 | Gramene |
|       | S4_31127313 | 4   | 31127313 | 4.32E-06 | 5.8     | <i>qFG4</i>          | <i>gn-4</i>            | 30,630,093 | 34,698,383 | Gramene |
|       | S4_31178256 | 4   | 31178256 | 4.51E-06 | 5.8     | <i>qFG4</i>          | <i>gn-4</i>            | 30,630,093 | 34,698,383 | Gramene |
|       | S4_16160917 | 4   | 16160917 | 3.43E-05 | 5.5     | <i>qFG4.1</i>        | -                      | -          | -          | -       |
| UF    | S8_10181188 | 8   | 10181188 | 9.73E-05 | 5.3     | <i>qFG8</i>          | -                      | -          | -          | -       |
|       | S3_1270943  | 3   | 1270943  | 6.97E-05 | 3.7     | <i>qUF3</i>          | <i>QSS3</i>            | 1,449,758  | 3,236,745  | Gramene |
| GWT   | S3_22283352 | 3   | 22283352 | 4.04E-05 | 3.8     | <i>qUF3.1</i>        | <i>qGW-3</i>           | 18350837   | 22306369   | qtaro   |
|       | S4_24502495 | 4   | 24502495 | 2.73E-06 | 6.5     | <i>qGWT4</i>         | <i>gpp4</i>            | 21645173   | 34244441   | qtaro   |
| GWT   | S4_25832541 | 4   | 25832541 | 5.92E-06 | 6.3     | <i>qGWT4.1</i>       | <i>gpp4</i>            | 21645173   | 34244441   | qtaro   |
|       | S4_27071141 | 4   | 27071141 | 1.85E-06 | 6.5     | <i>qGWT4.1</i>       | <i>gpp4</i>            | 21645173   | 34244441   | qtaro   |
|       | S4_31050939 | 4   | 31050939 | 2.43E-07 | 6.9     | <i>qGWT4.2</i>       | <i>gn-4</i>            | 30,630,093 | 34,698,383 | Gramene |
|       | S4_31025026 | 4   | 31025026 | 3.53E-07 | 6.8     | <i>qGWT4.2</i>       | <i>gn-4</i>            | 30,630,093 | 34,698,383 | Gramene |
|       | S4_31250082 | 4   | 31250082 | 4.53E-07 | 6.8     | <i>qGWT4.2</i>       | <i>gn-4</i>            | 30,630,093 | 34,698,383 | Gramene |
|       | S1_42038899 | 1   | 42038899 | 1.41E-05 | 8.5     | <i>qGN1</i>          | <i>QGn1</i>            | 41,967,890 | 41,969,197 | Gramene |
| TGN   | S4_31250082 | 4   | 31250082 | 1.22E-09 | 10.2    | <i>qGN4</i>          | <i>gn-4</i>            | 30,630,093 | 34,698,383 | Gramene |
|       | S4_31050939 | 4   | 31050939 | 1.62E-09 | 10.1    | <i>qGN4</i>          | <i>gn-4</i>            | 30,630,093 | 34,698,383 | Gramene |
|       | S4_31243064 | 4   | 31243064 | 2.53E-09 | 10.1    | <i>qGN4</i>          | <i>gn-4</i>            | 30,630,093 | 34,698,383 | Gramene |
|       | S2_19219429 | 2   | 19219429 | 7.90E-06 | 16.2    | <i>qGW2</i>          | -                      | -          | -          | -       |
| GW    | S2_19267209 | 2   | 19267209 | 6.25E-05 | 15.9    | <i>qGW2</i>          | -                      | -          | -          | -       |
|       | S2_19251646 | 2   | 19251646 | 9.48E-05 | 15.8    | <i>qGW2</i>          | -                      | -          | -          | -       |
|       | S3_16738452 | 3   | 16738452 | 2.20E-07 | 16.9    | <i>qGW3</i>          | <i>qGL<sub>3</sub></i> | 16,729,501 | 16,735,109 | RAP DB  |
|       | S3_16790082 | 3   | 16790082 | 6.99E-07 | 16.7    | <i>qGW3</i>          | <i>qGL<sub>3</sub></i> | 16,729,501 | 16,735,109 | RAP DB  |
|       | S3_16736739 | 3   | 16736739 | 1.73E-06 | 16.5    | <i>qGW3</i>          | <i>qGL<sub>3</sub></i> | 16,729,501 | 16,735,109 | RAP DB  |
|       | S5_5391586  | 5   | 5391586  | 4.30E-08 | 17.2    | <i>qGW5</i>          | <i>qGW-5b</i>          | 5,915,709  | 7,810,160  | Gramene |
|       | S7_24575488 | 7   | 24575488 | 1.58E-09 | 17.8    | <i>qGW7</i>          | <i>grb7-2</i>          | 22532352   | 25188107   | qtaro   |
|       | S7_24505270 | 7   | 24505270 | 6.17E-08 | 17.1    | <i>qGW7</i>          | <i>grb7-2</i>          | 22532352   | 25188107   | qtaro   |
|       | S7_24518753 | 7   | 24518753 | 1.16E-06 | 16.6    | <i>qGW7</i>          | <i>grb7-2</i>          | 22532352   | 25188107   | qtaro   |
|       | S8_26496216 | 8   | 26496216 | 5.52E-05 | 15.9    | <i>qGW8</i>          | -                      | -          | -          | -       |
|       | S8_26177616 | 8   | 26177616 | 6.51E-05 | 15.9    | <i>qGW8</i>          | -                      | -          | -          | -       |

Supplementary Table S3 Continued: Candidate QTLs and co-located QTLs detected by GWAS for 16 traits using MAGIC global population.

| Trait        | SNP         | Chr      | Pos      | P.value  | PVE (%)      | Detected QTLs (Term) | Reported QTLs            | Start      | End        | DB                   |
|--------------|-------------|----------|----------|----------|--------------|----------------------|--------------------------|------------|------------|----------------------|
| <b>GL</b>    | S3_16790082 | 3        | 16790082 | 2.56E-21 | 18.5         | <i>QGL3</i>          | <i>qGL<sub>3</sub></i>   | 16,729,501 | 16,735,109 | RAP DB               |
|              | S3_16738452 | 3        | 16738452 | 1.74E-20 | 18.1         | <i>QGL3</i>          | <i>qGL<sub>3</sub></i>   | 16,729,501 | 16,735,109 | RAP DB               |
|              | S3_16736739 | 3        | 16736739 | 1.18E-19 | 17.7         | <i>QGL3</i>          | <i>qGL<sub>3</sub></i>   | 16,729,501 | 16,735,109 | RAP DB               |
|              | S3_22283454 | 3        | 22283454 | 4.87E-07 | 12.0         | <i>QGL3.1</i>        | <i>qGW3</i>              | 18350837   | 22306369   | qtaro                |
|              | S3_20799507 | 3        | 20799507 | 6.80E-07 | 11.9         | <i>QGL3.1</i>        | <i>qGW3</i>              | 18350837   | 22306369   | qtaro                |
|              | S3_20691702 | 3        | 20691702 | 7.73E-07 | 11.9         | <i>QGL3.1</i>        | <i>qGW3</i>              | 18350837   | 22306369   | qtaro                |
| S11_21594187 | 11          | 21594187 | 4.01E-08 | 12.5     | <i>QGL11</i> | -                    | -                        | -          | -          | -                    |
| <b>CHAL</b>  | S4_22772120 | 4        | 22772120 | 1.51E-05 | 3.2          | <i>qCLK4</i>         | -                        | -          | -          | -                    |
| <b>KY</b>    |             |          |          |          |              |                      |                          |            |            |                      |
| <b>AC</b>    | S6_1760469  | 6        | 1760469  | 1.30E-25 | 19.3         | <i>qAC6</i>          | <i>amy6</i>              | 1,764,586  | 5,425,631  | Gramene              |
|              | S6_1742193  | 6        | 1742193  | 3.47E-25 | 19.1         | <i>qAC6</i>          | <i>amy6</i>              | 1,764,586  | 5,425,631  | Gramene              |
|              | S6_1892084  | 6        | 1892084  | 1.88E-24 | 18.7         | <i>qAC6</i>          | <i>amy6</i>              | 1,764,586  | 5,425,631  | Gramene              |
| <b>Fe</b>    | S3_16789935 | 3        | 16789935 | 1.59E-05 | 4.8          | <i>qFE3</i>          | -                        | -          | -          | -                    |
|              | S3_16789932 | 3        | 16789932 | 2.09E-05 | 4.8          | <i>qFE3</i>          | -                        | -          | -          | -                    |
|              | S3_16736681 | 3        | 16736681 | 3.23E-05 | 4.7          | <i>qFE3</i>          | -                        | -          | -          | -                    |
| <b>Zn</b>    | S1_40372091 | 1        | 40372091 | 5.59E-05 | 17.6         | <i>QZn1</i>          | -                        | -          | -          | -                    |
|              | S5_24312726 | 5        | 24312726 | 5.01E-06 | 18.0         | <i>QZn5</i>          | <i>rMQTL5.2</i>          | 23,906,571 | 25,164,524 | Jin, T. et al (2015) |
|              | S5_24280680 | 5        | 24280680 | 6.05E-06 | 17.9         | <i>QZn5</i>          | <i>rMQTL5.2</i>          | 23,906,571 | 25,164,524 | Jin, T. et al (2015) |
|              | S5_24583603 | 5        | 24583603 | 6.26E-06 | 17.9         | <i>QZn5</i>          | <i>rMQTL5.2</i>          | 23,906,571 | 25,164,524 | Jin, T. et al (2015) |
|              | S7_29281096 | 7        | 29281096 | 9.29E-12 | 20.1         | <i>QZn7</i>          | <i>qZn<sub>7.1</sub></i> | 29,323,098 | 29,324,607 | RAP DB               |
|              | S7_29285222 | 7        | 29285222 | 1.42E-10 | 19.6         | <i>QZn7</i>          | <i>qZn<sub>7.1</sub></i> | 29,323,098 | 29,324,607 | RAP DB               |
|              | S7_29285320 | 7        | 29285320 | 2.23E-10 | 19.6         | <i>QZn7</i>          | <i>qZn<sub>7.1</sub></i> | 29,323,098 | 29,324,607 | RAP DB               |
| <b>GYLD</b>  | S3_1222496  | 3        | 1222496  | 1.37E-05 | 9.2          | <i>qGYLD3</i>        | <i>qDF<sub>3</sub></i>   | 1,270,320  | 1,300,273  | RAP DB               |
|              | S3_519745   | 3        | 519745   | 5.80E-05 | 9.0          | <i>qGYLD3</i>        | <i>Hd9</i>               | 975995     | 1427051    | qtaro                |
|              | S3_519765   | 3        | 519765   | 5.80E-05 | 9.0          | <i>qGYLD3</i>        | <i>Hd9</i>               | 975995     | 1427051    | qtaro                |
|              | S4_31340357 | 4        | 31340357 | 8.01E-05 | 8.9          | <i>qGYLD4</i>        | <i>qGY4-1</i>            | 30,334,770 | 31,471,486 | Gramene              |
|              | S4_31340355 | 4        | 31340355 | 8.01E-05 | 8.9          | <i>qGYLD4</i>        | <i>qGY4-1</i>            | 30,334,770 | 31,471,486 | Gramene              |
|              | S4_30601183 | 4        | 30601183 | 8.66E-05 | 8.9          | <i>qGYLD4</i>        | <i>qGY4-1</i>            | 30,334,770 | 31,471,486 | Gramene              |

Supplementary Table S4. Candidate QTLs and co-located QTLs identified for 16 traits by interval mapping using MAGIC global population. (Green colours are QTL accession ID in Gramene database)

| Trait            | Chr | Left Marker  | Right Marker | P-value  | PVE (%) | Detected QTL   | Reported QTLs            | Start      | End        | DB      |
|------------------|-----|--------------|--------------|----------|---------|----------------|--------------------------|------------|------------|---------|
| <b>PHT</b>       | 1   | S1_38320382  | S1_38366724  | 0        | 38.71   | <i>qPHT1</i>   | <i>qPH<sub>1</sub></i>   | 38,382,385 | 38,385,469 | RAP DB  |
| <b>PTN</b>       | 3   | S3_33887305  | S3_33947047  | 2.03E-08 | 4.68    | <i>qTn3</i>    | <i>tn3-4</i>             | 32,945,649 | 32,949,568 | Gramene |
| <b>DTF</b>       | 3   | S3_1298618   | S3_1326339   | 0        | 14.11   | <i>qDTF3</i>   | <i>qDF<sub>3</sub></i>   | 1,270,320  | 1,300,273  | RAP DB  |
|                  | 6   | S6_9291056   | S6_9317830   | 1.61E-08 | 3.89    | <i>qDTF6</i>   | <i>Hd1</i>               | 9,282,505  | 9,327,178  | Gramene |
|                  | 10  | S10_15240779 | S10_15308947 | 6.09E-06 | 3.16    | <i>qDTF10</i>  | AQCU191                  | 15,800,310 | 15,802,326 | Gramene |
|                  | 11  | S11_26417020 | S11_26444568 | 1.90E-06 | 2.81    | <i>qDTF11</i>  | <i>hd11</i>              | 25,617,694 | 25,618,047 | Gramene |
|                  | 12  | S12_18903812 | S12_18959853 | 1.67E-07 | 3.07    | <i>qDTF12</i>  | <i>QHd12</i>             | 19,628,443 | 19,628,925 | Gramene |
| <b>PNL</b>       | 1   | S1_36339891  | S1_36388187  | 8.97E-09 | 4.99    | <i>qPNL1.2</i> | <i>ng1</i>               | 34264553   | 36658883   | qtaro   |
|                  | 7   | S7_25670580  | S7_25740983  | 1.99E-08 | 4.82    | <i>qPNL7</i>   | <i>PL</i><br>(AQFW104)   | 17,525,817 | 25,775,868 | Gramene |
| <b>SPAD</b>      | 1   | S1_38608785  | S1_38636497  | 3.22E-05 | 2.99    | <i>qCHP1</i>   | <i>QDg1</i>              | 32,987,234 | 37,889,506 | Gramene |
| <b>FG</b>        | 2   | S2_5719097   | S2_5755777   | 1.00E-04 | 2.37    | <i>qFG2</i>    | AQFW259                  | 5,262,891  | 6,916,662  | Gramene |
|                  | 8   | S8_17190812  | S8_17220500  | 7.90E-05 | 2.43    | <i>qFG8.1</i>  | <i>Qsf8</i>              | 13,927,893 | 20,650,257 | Gramene |
| <b>UF</b>        | 2   | S2_21055606  | S2_21301325  | 4.69E-05 | 2.9     | <i>qUF2</i>    | -                        | -          | -          | -       |
| <b>TGN</b>       | 4   | S4_31242011  | S4_31306595  | 3.98E-07 | 4.29    | <i>qGN4</i>    | <i>gn-4</i>              | 30,630,093 | 34,698,383 | Gramene |
|                  | 6   | S6_6798463   | S6_6827955   | 0.000206 | 2.78    | <i>qGN6</i>    | <i>tns6</i>              | 6023974    | 9537572    | qtaro   |
| <b>GWT</b>       | 4   | S4_28901212  | S4_29032959  | 8.68E-05 | 3.05    | <i>qGWT4.3</i> | <i>gpp4</i>              | 21645173   | 34244441   | qtaro   |
|                  | 6   | S6_12427481  | S6_12462746  | 0.00029  | 2.8     | <i>qGWT6</i>   | <i>gw-6</i>              | 9282143    | 17933378   | qtaro   |
| <b>GW</b>        | 3   | S3_16789932  | S3_16835528  | 0.000122 | 4.29    | <i>qGW3</i>    | <i>qGL<sub>3</sub></i>   | 16,729,501 | 16,735,109 | RAP DB  |
|                  | 5   | S5_6073584   | S5_6193620   | 2.51E-08 | 6.56    | <i>qGW5</i>    | <i>qGW-5b</i>            | 5,915,709  | 7,810,160  | Gramene |
|                  | 7   | S7_25362785  | S7_25403593  | 5.16E-13 | 8.72    | <i>qGW7</i>    | <i>grb7-2</i>            | 22532352   | 25188107   | qtaro   |
|                  | 9   | S9_490750    | S9_549225    | 0.000249 | 3.79    | <i>qGW9</i>    | -                        | -          | -          | -       |
| <b>GL</b>        | 3   | S3_16835528  | S3_16881568  | 0        | 15.38   | <i>QGL3</i>    | <i>qGL<sub>3</sub></i>   | 16,729,501 | 16,735,109 | RAP DB  |
|                  | 4   | S4_24200211  | S4_24235414  | 0.000703 | 3.86    | <i>QGL4</i>    | -                        | -          | -          | -       |
|                  | 4   | S4_33153080  | S4_33186346  | 8.92E-06 | 4.43    | <i>QGL4.1</i>  | AQEO011                  | 31,065,233 | 34,698,383 | Gramene |
|                  | 7   | S7_24637566  | S7_24667807  | 5.76E-07 | 4.52    | <i>QGL7</i>    | AQEO012                  | 24,085,141 | 25,990,300 | Gramene |
| <b>CHALKY AC</b> | 2   | S2_28138470  | S2_28176697  | 6.26E-07 | 4.28    | <i>qCLK2</i>   | <i>qER-2b</i>            | 27533328   | 28207849   | qtaro   |
|                  | 1   | S1_3573499   | S1_3609856   | 0.000395 | 2.85    | <i>qAC1</i>    | -                        | -          | -          | -       |
|                  | 6   | S6_2242943   | S6_2343850   | 0        | 22.43   | <i>qAC6</i>    | <i>amy6</i>              | 1,764,586  | 5,425,631  | Gramene |
|                  | 6   | S6_28201779  | S6_28254038  | 0.000331 | 2.72    | <i>qAC6.1</i>  | <i>ac6.1</i>             | 25,691,434 | 30,447,453 | Gramene |
| <b>FE</b>        | 6   | S6_8338324   | S6_8367701   | 7.08E-05 | 2.81    | <i>qFE6</i>    | -                        | -          | -          | -       |
| <b>ZN</b>        | 1   | S1_31264631  | S1_31502695  | 2.71E-08 | 5.33    | <i>QZn1.1</i>  | -                        | -          | -          | -       |
|                  | 7   | S7_29490504  | S7_29519361  | 2.66E-13 | 7.71    | <i>QZn7</i>    | <i>qZn<sub>7.1</sub></i> | 29,323,098 | 29,324,607 | RAP DB  |
| <b>GYLD</b>      | 2   | S2_5364882   | S2_5474837   | 6.31E-06 | 2.8     | <i>qGYLD2</i>  | -                        | -          | -          | -       |
|                  | 3   | S3_1775265   | S3_1827398   | 8.32E-09 | 4.41    | <i>qGYLD3</i>  | <i>Hd9</i>               | 975995     | 1427051    | qtaro   |

Supplementary Table S5. Candidate QTLs and co-located QTLs identified for 16 traits by Bayesian networking using MAGIC global population. (Green colours are QTL accession ID in Gramene database)

| Trait       | Encoded Marker | SNP_Marker   | Detected QTLs (Term) | Reported QTLs          | Start      | End        | DB      |
|-------------|----------------|--------------|----------------------|------------------------|------------|------------|---------|
| <b>PHT</b>  | G973           | S1_38286772  | <i>qPHT1</i>         | <i>qPH<sub>1</sub></i> | 38,382,385 | 38,385,469 | RAP-DB  |
|             | G977           | S1_38384548  | <i>qPHT1</i>         | <i>qPH<sub>1</sub></i> | 38,382,385 | 38,385,469 | RAP-DB  |
|             | G6966          | S10_20045466 | <i>qPHT10</i>        | <i>eui2</i>            | 19184232   | 19184413   | qtaro   |
|             | G2763          | S3_33693235  | <i>qPHT3.1</i>       | <i>pla3/gp</i>         | 33710350   | 33719780   | qtaro   |
| <b>PTN</b>  | G6490          | S9_19628945  | <i>qTn9</i>          | <i>gy9</i>             | 19464779   | 22021406   | qtaro   |
|             | G1974          | S3_1195479   | <i>qTn3.1</i>        | <i>Hd9</i>             | 975995     | 1427051    | qtaro   |
|             | G1566          | S2_20894023  | <i>qTn2</i>          | <i>nt2.1</i>           | 20,794,972 | 20,795,112 | Gramene |
| <b>DTF</b>  | G1974          | S3_1195479   | <i>qDTF3</i>         | <i>qDF<sub>3</sub></i> | 1,270,320  | 1,300,273  | RAP-DB  |
|             | G6078          | S8_26741308  | <i>qDTF8.1</i>       | <i>QHd8b</i>           | 27,822,512 | 27,825,271 | qTaro   |
|             | G3745          | S5_6696580   | <i>qDTF5</i>         | <b>AQFW190</b>         | 5,255,880  | 6,700,408  | Gramene |
|             | G5531          | S8_3596776   | <i>qDTF8</i>         | <i>qDTH8</i>           | 3170545    | 5333855    | qtaro   |
| <b>PNL</b>  | G5427          | S7_29285320  | <i>qPNL7.1</i>       | <i>fzp</i>             | 28959761   | 28961248   | qtaro   |
|             | G977           | S1_38384548  | <i>qPNL1.1</i>       | <i>qPH<sub>1</sub></i> | 38,382,385 | 38,385,469 | RAP-DB  |
|             | G5322          | S7_23358106  | <i>qPNL7</i>         | <b>PL (AQFW104)</b>    | 17,525,817 | 25,775,868 | Gramene |
|             | G7243          | S11_11196796 | <i>qPNL11</i>        | -                      | -          | -          | -       |
|             | G5395          | S7_27812448  | <i>qPNL7.2</i>       | -                      | -          | -          | -       |
| <b>SPAD</b> | G973           | S1_38286772  | <i>qCHP1</i>         | <i>QDg1</i>            | 32,987,234 | 37,889,506 | Gramene |
|             | G3226          | S4_20620638  | <i>qCHP4</i>         | <i>QDg4a</i>           | 18,824,746 | 20,519,179 | Gramene |
|             | G6677          | S10_3844218  | <i>qCHP10</i>        | -                      | -          | -          | -       |
|             | G2611          | S3_27416059  | <i>qCHP3</i>         | <i>QFhw3</i>           | 25891087   | 27899169   | Gramene |
| <b>FG</b>   | G6263          | S9_10480864  | <i>qFG9</i>          | -                      | -          | -          | -       |
| <b>UF</b>   | G1575          | S2_21522115  | <i>qUF2</i>          | -                      | -          | -          | -       |
|             | G4153          | S5_28311001  | <i>qUF5.1</i>        | <i>qpss5.1</i>         | 28,850,701 | 29,193,114 | Gramene |
|             | G7891          | S12_17575885 | <i>qUF12</i>         | -                      | -          | -          | -       |
|             | G3749          | S5_7024543   | <i>qUF5</i>          | <b>AQDS028</b>         | 6,132,767  | 6,133,121  | Gramene |
|             | G3214          | S4_20319632  | <i>qUF4</i>          | -                      | -          | -          | -       |
| <b>GWT</b>  | G1677          | S2_25256653  | <i>qGWT2</i>         | <i>yld2.1</i>          | 21658702   | 26758298   | qtaro   |
| <b>TGN</b>  | G639           | S1_25071517  | <i>qGN1.1</i>        | -                      | -          | -          | -       |
|             | G3378          | S4_27071141  | <i>qGN4.1</i>        | <i>gpp4</i>            | 21645173   | 34244441   | qtaro   |
| <b>GW</b>   | G5326          | S7_23508951  | <i>qGW7</i>          | <i>grb7-2</i>          | 22532352   | 25188107   | qtaro   |
|             | G3716          | S5_5391586   | <i>qGW5</i>          | <i>qGW-5b</i>          | 5,915,709  | 7,810,160  | Gramene |
|             | G6077          | S8_26496216  | <i>qGW8</i>          | -                      | -          | -          | -       |
|             | G1536          | S2_19219429  | <i>qGW2</i>          | -                      | -          | -          | -       |
|             | G2000          | S3_2111982   | <i>qGW3.1</i>        | <b>AQFU044</b>         | 1,945,837  | 1,945,949  | Gramene |
|             | G1719          | S2_26305798  | <i>qGW2.1</i>        | <b>AQDH006</b>         | 24,565,710 | 28,690,518 | Gramene |
|             | G2607          | S3_27161149  | <i>qGW3.2</i>        | <b>AQF146</b>          | 27,127,661 | 27,128,592 | Gramene |
|             | G3378          | S4_27071141  | <i>qGW4</i>          | <b>AQT018</b>          | 26,857,374 | 26,857,637 | Gramene |
| <b>GL</b>   | G2414          | S3_16804378  | <i>QGL3</i>          | <i>qGL<sub>3</sub></i> | 16,729,501 | 16,735,109 | RAP-DB  |
|             | G4280          | S6_4849135   | <i>QGL6</i>          | <i>qLW-6</i>           | 4234080    | 5096867    | qtaro   |

Supplementary Table S5 Continued: Candidate QTLs and co-located QTLs identified for 16 traits by Bayesian networking using MAGIC global population. (Green colours are QTL accession ID in Gramene database)

| Trait         | Encoded Marker | SNP_Marker   | Detected QTLs (Term) | Reported QTLs                      | Start      | End        | DB                      |
|---------------|----------------|--------------|----------------------|------------------------------------|------------|------------|-------------------------|
| <b>CHALKY</b> | G7537          | S11_28940588 | <i>qCLK11</i>        | -                                  | -          | -          | -                       |
|               | G6072          | S8_26351053  | <i>qCLK8</i>         | qPGWC8                             | 26637711   | 28166213   | qtaro                   |
|               | G1677          | S2_25256653  | <i>qCLK2.1</i>       | -                                  | -          | -          | -                       |
| <b>AC</b>     | G4247          | S6_2395083   | <i>qAC6</i>          | <i>amy6</i>                        | 1,764,586  | 5,425,631  | Gramene                 |
|               | G4232          | S6_1594459   | <i>qAC6</i>          | <i>amy6</i>                        | 1,764,586  | 5,425,631  | Gramene                 |
|               | G4240          | S6_1875657   | <i>qAC6</i>          | <i>amy6</i>                        | 1,764,586  | 5,425,631  | Gramene                 |
|               | G4231          | S6_1577068   | <i>qAC6</i>          | <i>amy6</i>                        | 1,764,586  | 5,425,631  | Gramene                 |
|               | G1558          | S2_20416453  | <i>qAC2</i>          | <i>OsTudor-SN</i>                  | 19956716   | 19963395   | qtaro                   |
|               | G5723          | S8_11527473  | <i>qAC8</i>          | -                                  | -          | -          | -                       |
|               | G2553          | S3_23085395  | <i>qAC3</i>          | -                                  | -          | -          | -                       |
| <b>FE</b>     | G7537          | S11_28940588 | <i>qFE11</i>         | -                                  | -          | -          | -                       |
|               | G6544          | S9_21464008  | <i>qFE9</i>          | -                                  | -          | -          | -                       |
|               | G175           | S1_5861931   | <i>qFE1</i>          | -                                  | -          | -          | -                       |
|               | G3378          | S4_27071141  | <i>qFE4</i>          | -                                  | -          | -          | -                       |
| <b>ZN</b>     | G5427          | S7_29285320  | <i>QZn7</i>          | <i>qZn7.1</i><br>( <i>OsNAS3</i> ) | 29,323,098 | 29,324,607 | RAP-DB                  |
|               | G2772          | S3_34454955  | <i>QZn3</i>          | -                                  | -          | -          | -                       |
|               | G1064          | S1_40397644  | <i>QZn1</i>          | -                                  | -          | -          | -                       |
|               | G4833          | S6_28415597  | <i>QZn6</i>          | -                                  | -          | -          | -                       |
|               | G4102          | S5_24583603  | <i>QZn5</i>          | <i>rMQTL5.2</i>                    | 23,906,571 | 25,164,524 | Jin, T.<br>et al (2015) |
|               | G8099          | S12_27193387 | <i>QZn12</i>         | -                                  | -          | -          | -                       |
|               | G7238          | S11_10977733 | <i>QZn11</i>         | -                                  | -          | -          | -                       |
|               | G158           | S1_5302109   | <i>QZn1.2</i>        | -                                  | -          | -          | -                       |
| <b>GYLD</b>   | G1969          | S3_985889    | <i>qGYLD3</i>        | <i>Hd9</i>                         | 975995     | 1427051    | qtaro                   |
|               | G3247          | S4_21869643  | <i>qGYLD4.1</i>      | <i>gpp4</i>                        | 21645173   | 34244441   | qtaro                   |
|               | G4297          | S6_5209182   | <i>qGYLD6</i>        | ID210                              | 3459492    | 6023472    | qtaro                   |

Supplementary Table S6. Top candidate genes of significant genomic regions detected by gene association analysis.

| <b>Trait</b>       | <b>GENE</b>    | <b>CHR</b> | <b>START</b> | <b>STOP</b> | <b>ZSTAT</b> | <b>P</b>  |
|--------------------|----------------|------------|--------------|-------------|--------------|-----------|
| <i>GYLD_qDF3</i>   | LOC_Os03g01780 | 3          | 485271       | 486556      | 3.7927       | 7.45E-05  |
|                    | LOC_Os03g03164 | 3          | 1340052      | 1345295     | 3.7114       | 0.0001031 |
|                    | LOC_Os03g01860 | 3          | 519135       | 519795      | 3.6104       | 0.0001528 |
|                    | LOC_Os03g02960 | 3          | 1194255      | 1196505     | 3.4557       | 0.0002744 |
|                    | LOC_Os03g02970 | 3          | 1195075      | 1204839     | 3.4557       | 0.0002744 |
| <i>AC_Amy</i>      | LOC_Os06g04190 | 6          | 1754351      | 1760884     | 10.395       | 1.30E-25  |
|                    | LOC_Os06g04169 | 6          | 1736249      | 1742581     | 10.301       | 3.47E-25  |
|                    | LOC_Os06g04360 | 6          | 1856820      | 1861053     | 10.011       | 6.84E-24  |
|                    | LOC_Os06g04280 | 6          | 1816175      | 1819804     | 9.6676       | 2.07E-22  |
|                    | LOC_Os06g04230 | 6          | 1784311      | 1784827     | 9.3812       | 3.26E-21  |
| <i>ZN_OsFRDL4</i>  | LOC_Os01g69870 | 1          | 40371946     | 40373618    | 3.4009       | 0.0003358 |
|                    | LOC_Os01g69910 | 1          | 40397303     | 40403249    | 3.3855       | 0.0003552 |
| <i>ZN_rMQTL5.2</i> | LOC_Os05g41450 | 5          | 24275818     | 24280710    | 4.7738       | 9.04E-07  |
|                    | LOC_Os05g41460 | 5          | 24279602     | 24281856    | 4.5858       | 2.26E-06  |
|                    | LOC_Os05g41510 | 5          | 24301347     | 24311126    | 4.5589       | 2.57E-06  |
|                    | LOC_Os05g41660 | 5          | 24383180     | 24384628    | 4.2627       | 1.01E-05  |
|                    | LOC_Os05g41480 | 5          | 24287569     | 24289620    | 4.0721       | 2.33E-05  |
| <i>ZN_qZn7.1</i>   | LOC_Os07g48940 | 7          | 29280094     | 29282008    | 6.7168       | 9.29E-12  |
|                    | LOC_Os07g49110 | 7          | 29392447     | 29401913    | 6.0933       | 5.53E-10  |
|                    | LOC_Os07g49000 | 7          | 29338447     | 29341163    | 5.6864       | 6.49E-09  |
|                    | LOC_Os07g49114 | 7          | 29404417     | 29405293    | 5.4038       | 3.26E-08  |
|                    | LOC_Os07g48970 | 7          | 29303615     | 29309383    | 5.2248       | 8.72E-08  |
